# Supplementary material for: Atlas-scale single-cell multi-sample multi-condition data integration using scMerge2
Source: PubMed Central journal article supplement (PMC10352351; doi:10.1038/s41467-023-39923-2), 2023-07-17
Supplement: 41467_2023_39923_MOESM1_ESM.pdf [file 41467_2023_39923_MOESM1_ESM.pdf]

# 1 **Supplementary Information**

## 2 **Supplementary Information for “Atlas-scale single-cell multi-sample multi-condition data** 3 **integration using scMerge2”**

4 Table of content

5 A. Supplementary Figures S1-18

6 B. Supplementary Table 1: Data collections used in the paper.

## 7 Supplementary Figures

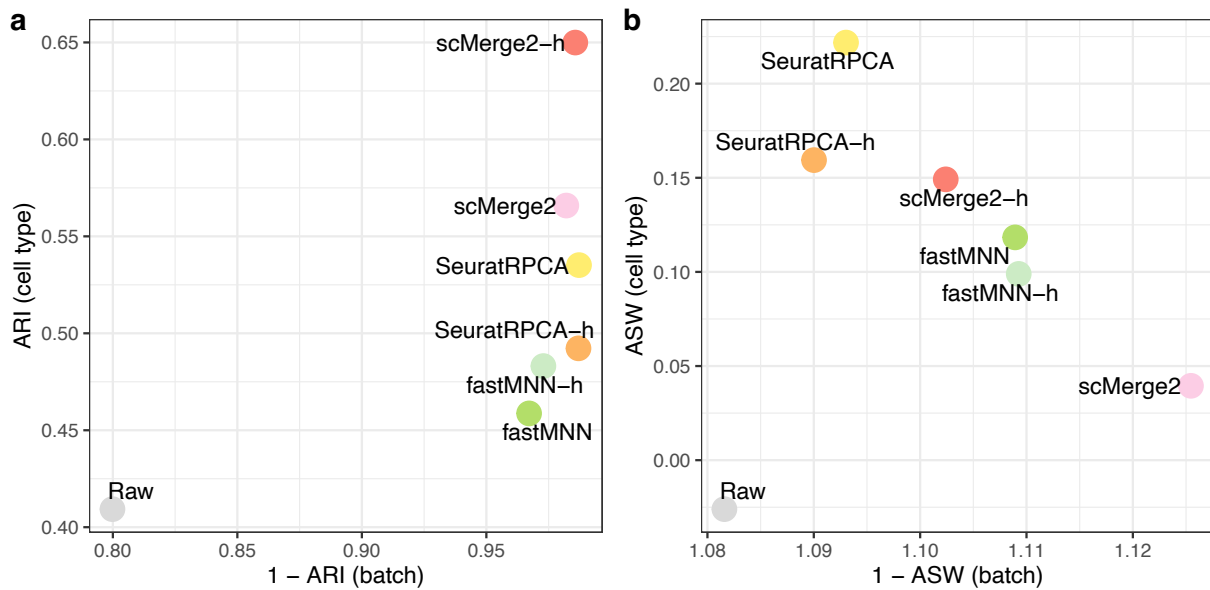

Supplementary Figure S1: Data integration evaluation to compared methods with hierarchical merging settings: Scatter plots of evaluation metrics of data integration of a 200k cells COVID-19 data for scMerge2, scMerge2-h, SeuratRPCA, SeuratRPCA-h, fastMNN and fastMNN-h: (a) Adjusted rand index (ARI), where x-axis indicates 1 minus batch ARI and y-axis indicates cell type ARI; (b) Average silhouette width (ASW), where the x-axis is 1 minus batch ASW and y-axis is the cell type ASW.

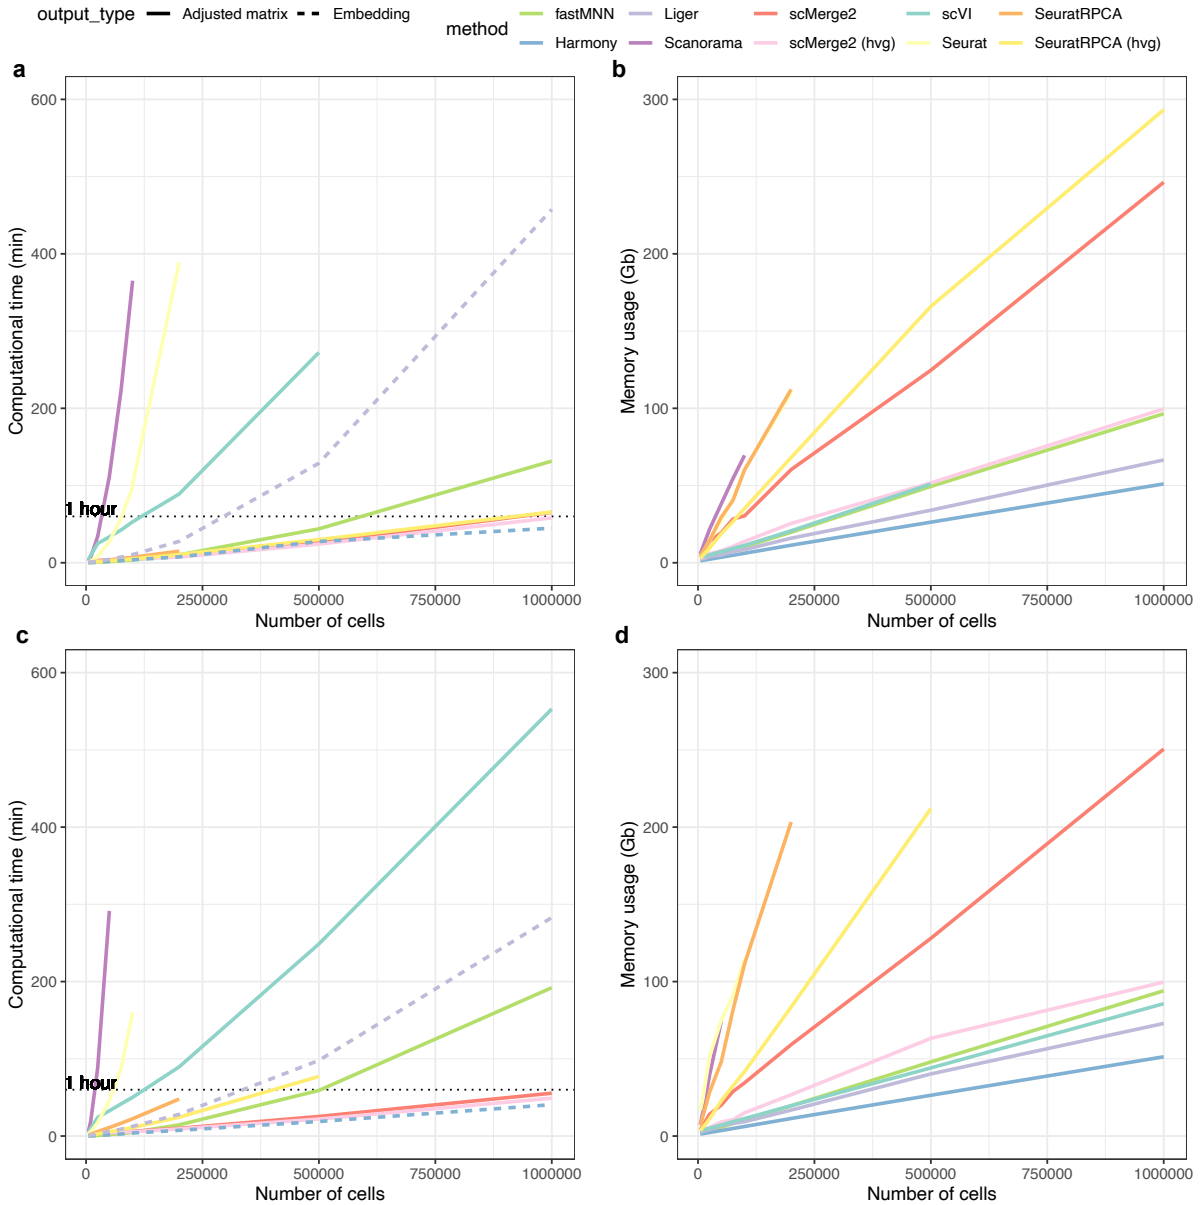

Supplementary Figure S2: Scalability of each data integration method of the RNA integration task with (a-b) 2 batches in the data and (c-d) 6 batches in the data, colored by the methods and the type of the lines indicate the output type of the methods. (a, c) shows computational time (min) for each method increase with the number of cells in the data; (b, d) shows memory usage (Gb) for each method increase with the number of cells. Note that SeuratRPCA encountered a memory error when integrating the full gene expression matrix of 500k cells, and SeuratRPCA (hvg) encountered a memory error when integrating the full gene expression matrix of 1 million cells for 6 batches cases.

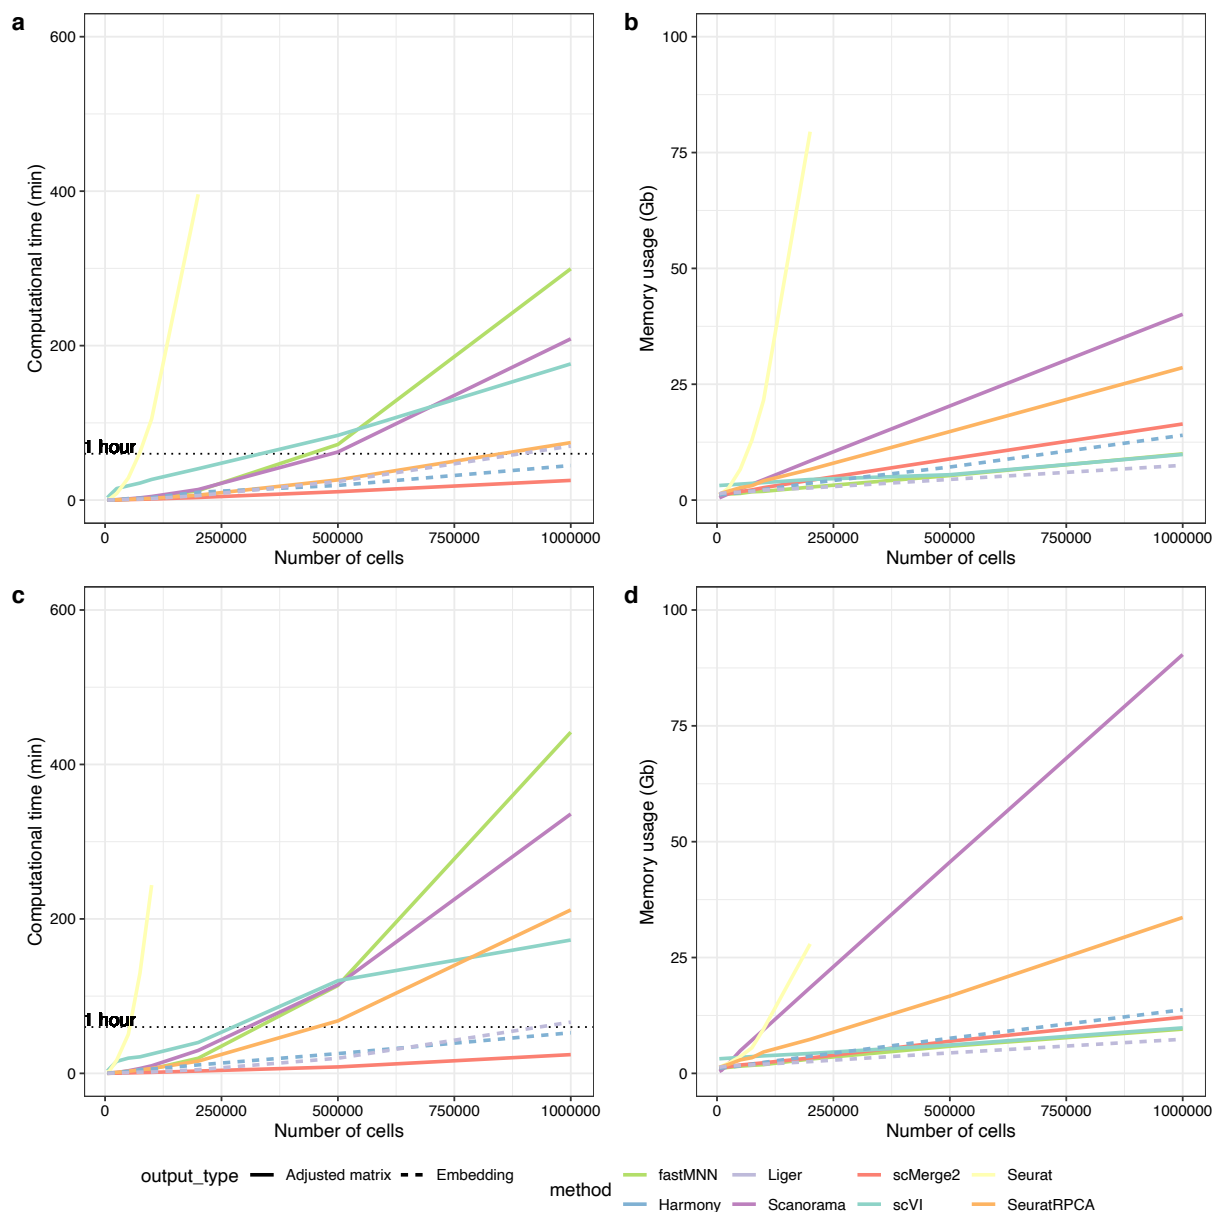

Supplementary Figure S3: Scalability of each data integration method of the ADT integration task with (a-b) 2 batches in the data and (c-d) 6 batches in the data, colored by the methods and the type of the lines indicate the output type of the methods. (a, c) shows computational time (min) for each method increase with the number of cells in the data; (b, d) shows memory usage (Gb) for each method increase with the number of cells.

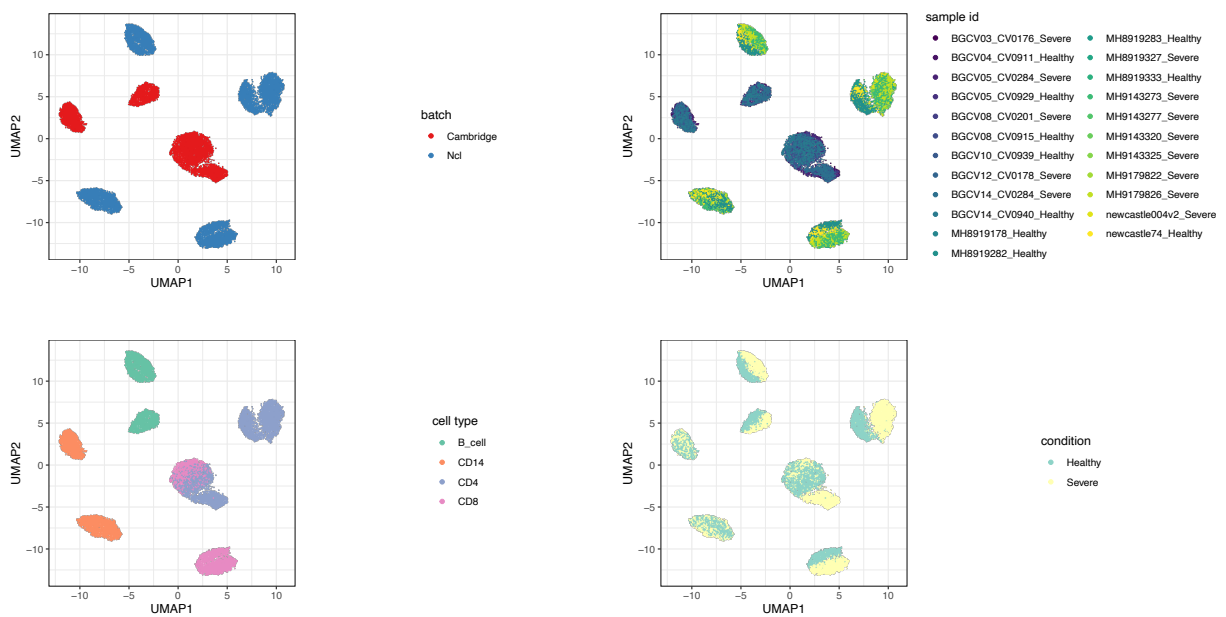

Supplementary Figure S4: UMAP plots of an example of simulated data ( $\logFC = 1.2$ ,  $DS\% = 5\%$ ), coloured by batch, sample id, cell type and condition.

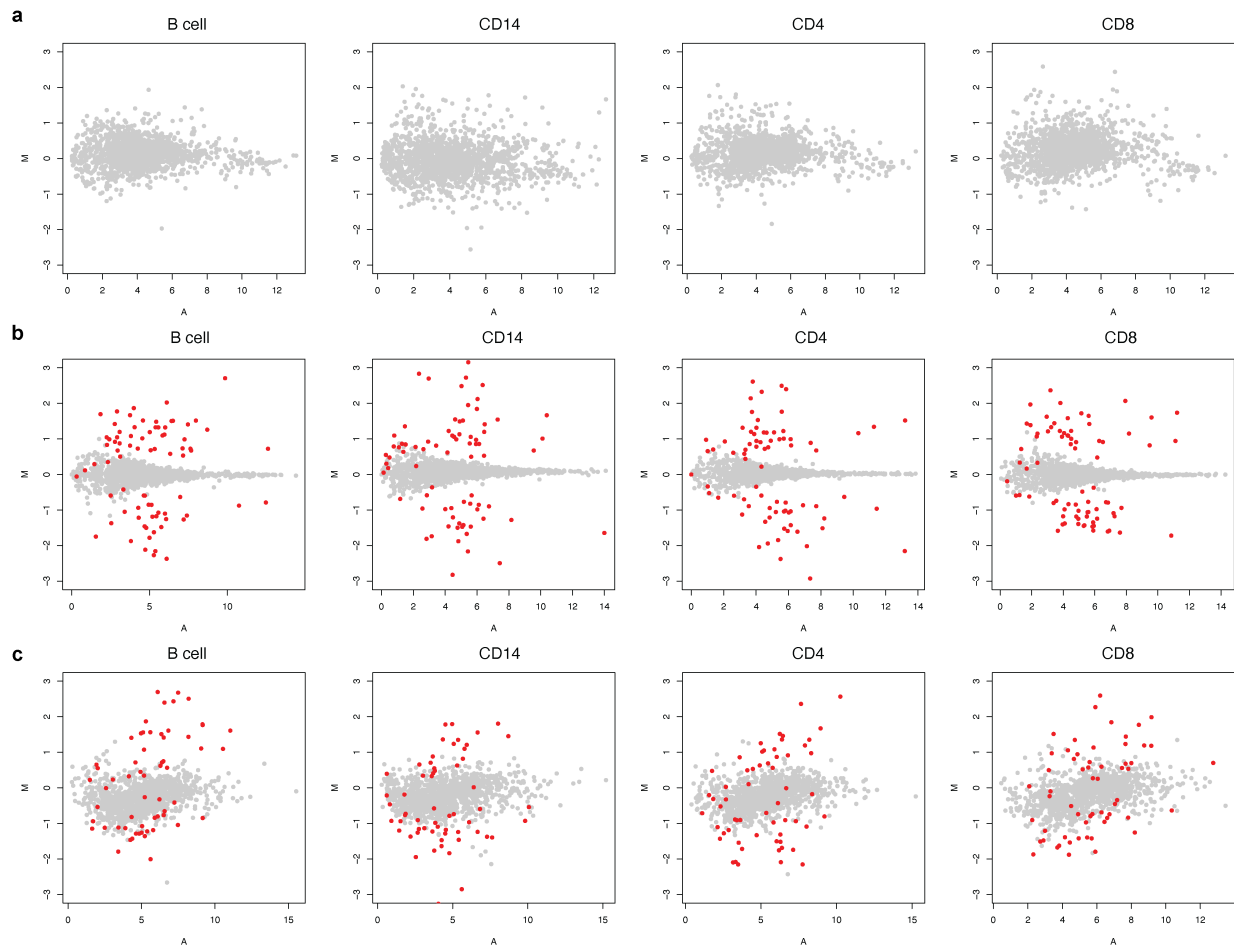

Supplementary Figure S5: MA plots of the real and simulated data, where x-axis is the average of gene expression and y-axis is the difference of the gene expression between two conditions: (a) Real data; (b) Simulated data using mu formula  $\sim \text{cell type}$ , estimated from data with one condition; (c) Simulated data using mu formula  $\sim \text{cell type} + \text{sample ID} + \text{condition}$ , estimated from data from two conditions but with condition label permuted. The red dots indicates the simulated ground truth DS genes. The simulation strategy (c) exhibits a more similar pattern with the real data, which therefore is used in this study.

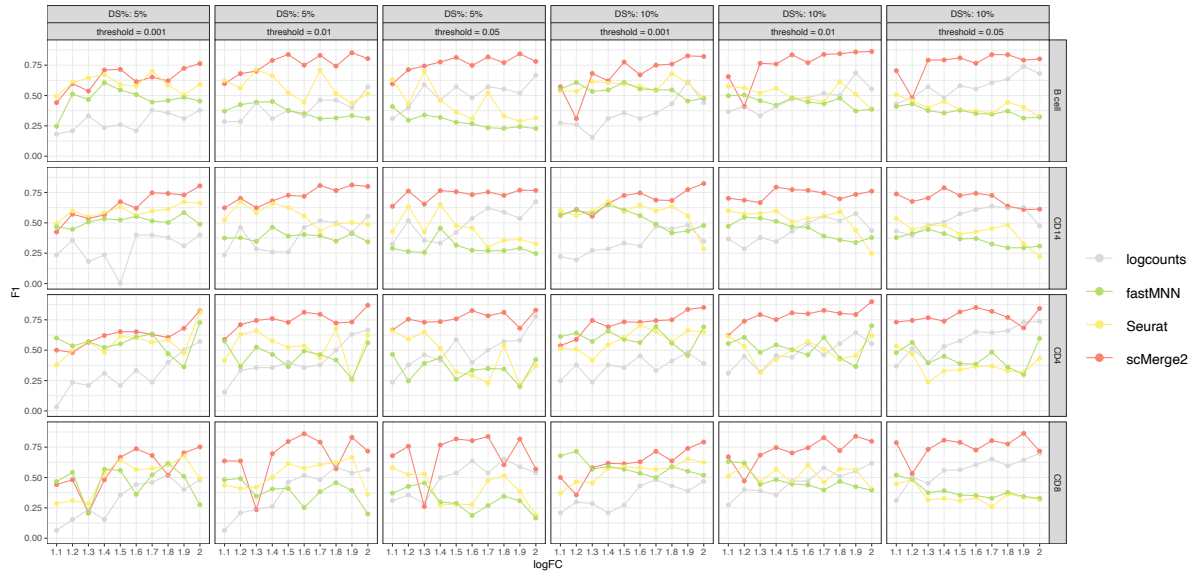

Supplementary Figure S6: F1-score of the differential state (DS) results of four cell types (B cell, CD14, CD4 and CD8) (row) of simulated data, with 5% (1st - 3rd column) and 10% DS genes (4th - 6th column) within each cell type, for scMerge2, Seurat, fastMNN and raw, varying simulated log fold change (logFC) of DS genes (x-axis) and different threshold of adjusted p-value (column).

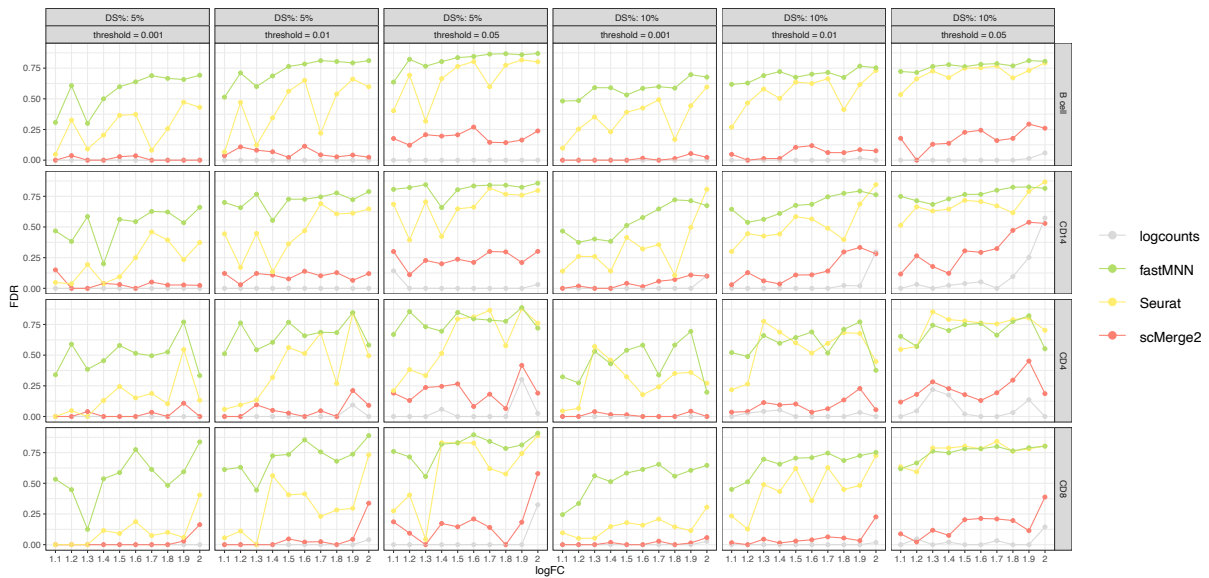

Supplementary Figure S7: FDR of the differential state (DS) results of four cell types (B cell, CD14, CD4 and CD8) (row) of simulated data, with 5% (1st - 3rd column) and 10% DS genes (4th - 6th column) within each cell type, for scMerge2, Seurat, fastMNN and raw, varying simulated log fold change (logFC) of DS genes (x-axis) and different threshold of adjusted p-value (column).

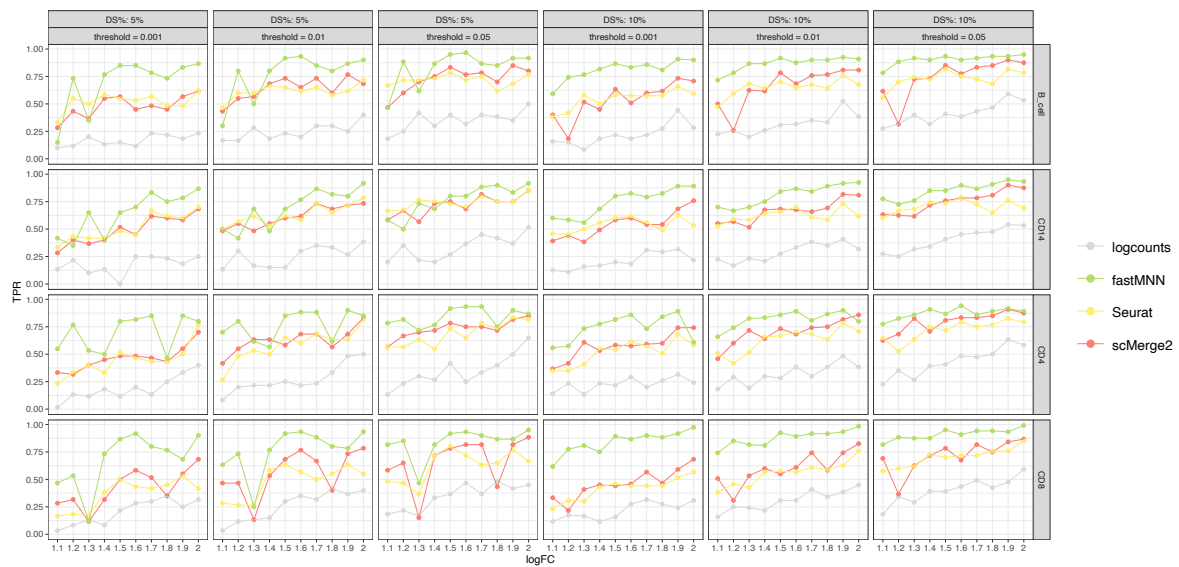

Supplementary Figure S8: TPR of the differential state (DS) results of four cell types (B cell, CD14, CD4 and CD8) (row) of simulated data, with 5% (1st - 3rd column) and 10% DS genes (4th - 6th column) within each cell type, for scMerge2, Seurat, fastMNN and raw, varying simulated log fold change (logFC) of DS genes (x-axis) and different threshold of adjusted p-value (column).



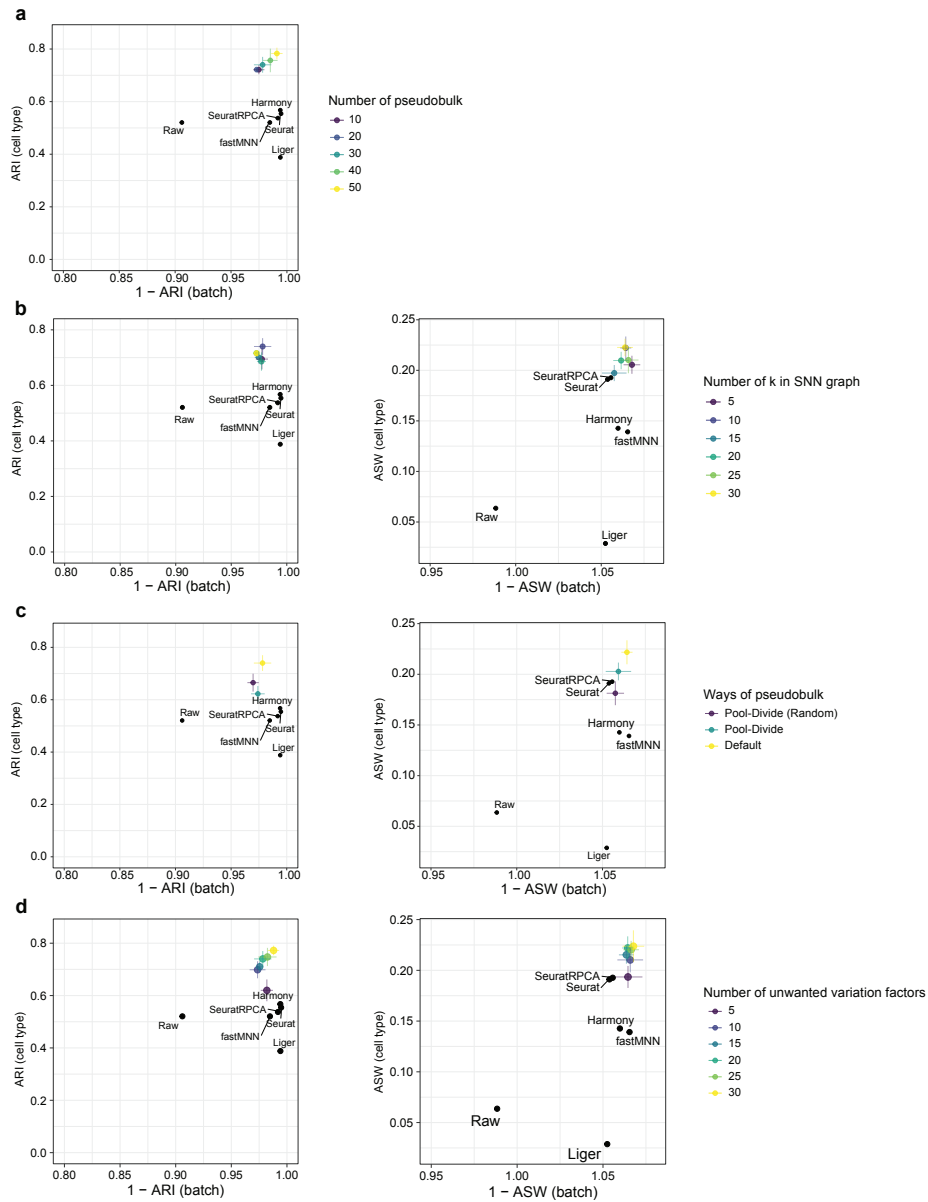

Supplementary Figure S9: Robustness analysis of the tuning parameters of scMerge2 using COVID-19 60k data: Adjusted rand index (ARI) (left panel), where x-axis indicates 1 minus batch ARI and y-axis indicates cell type ARI; Average silhouette width (ASW), where x-axis indicates 1 minus batch ASW and y-axis indicates cell type ASW (right panel), when varying (a) the number of pseudobulk constructed (10, 20, 30 (default), 40, 50); (b) the number of k used in SNN graph (5, 10 (default), 15, 20, 25, 30); (c) different methods to construct pseudobulk. (d) Number of unwanted variation factors (5, 10, 15, 20 (default), 25, 30).

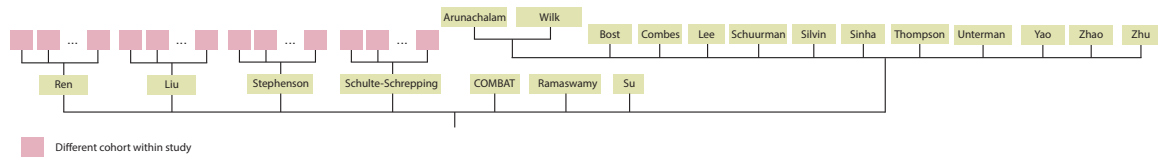

Supplementary Figure S10: Hierarchical merging strategy for COVID-19 scRNA-seq data collection.

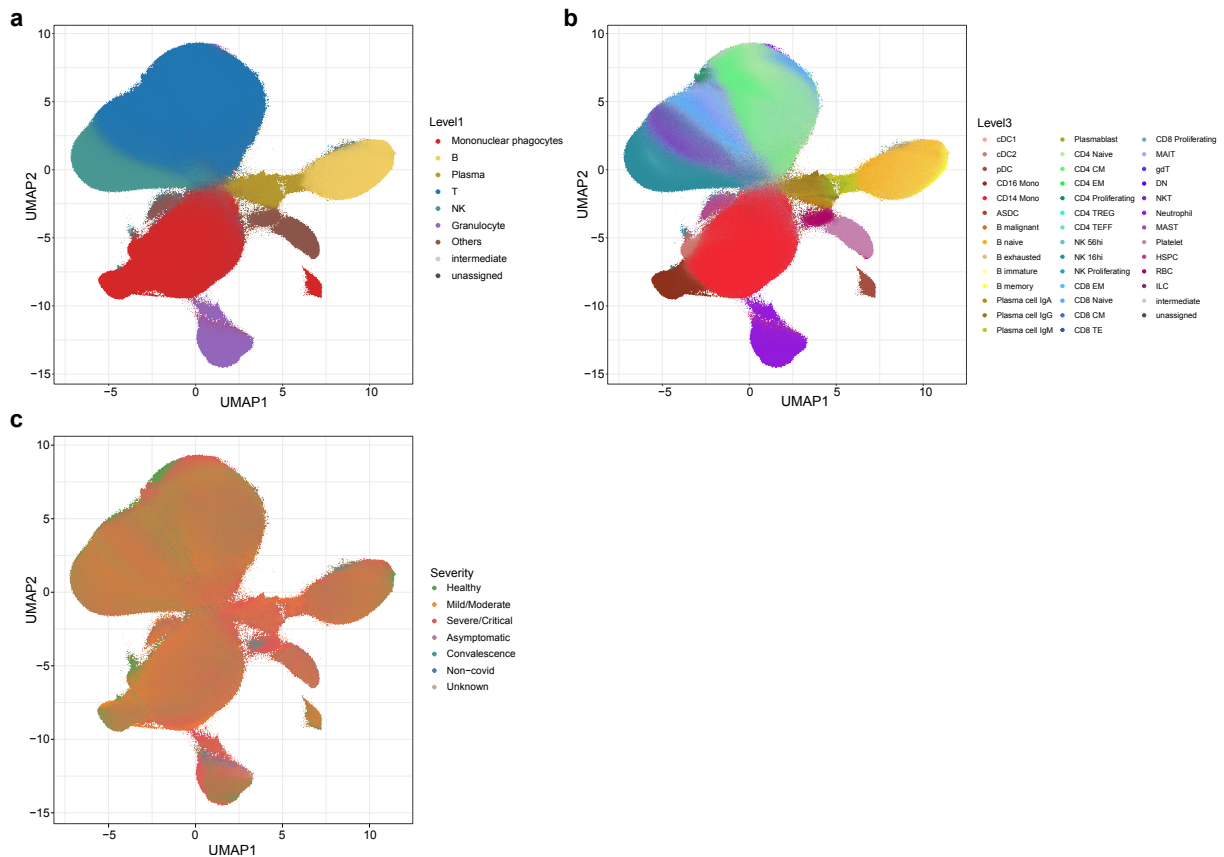

Supplementary Figure S11: UMAP of integration of COVID-19 data collection after scMerge2 integration, coloured by (a) level 1 cell type annotation; (b) level 3 cell type annotation and (c) severity.

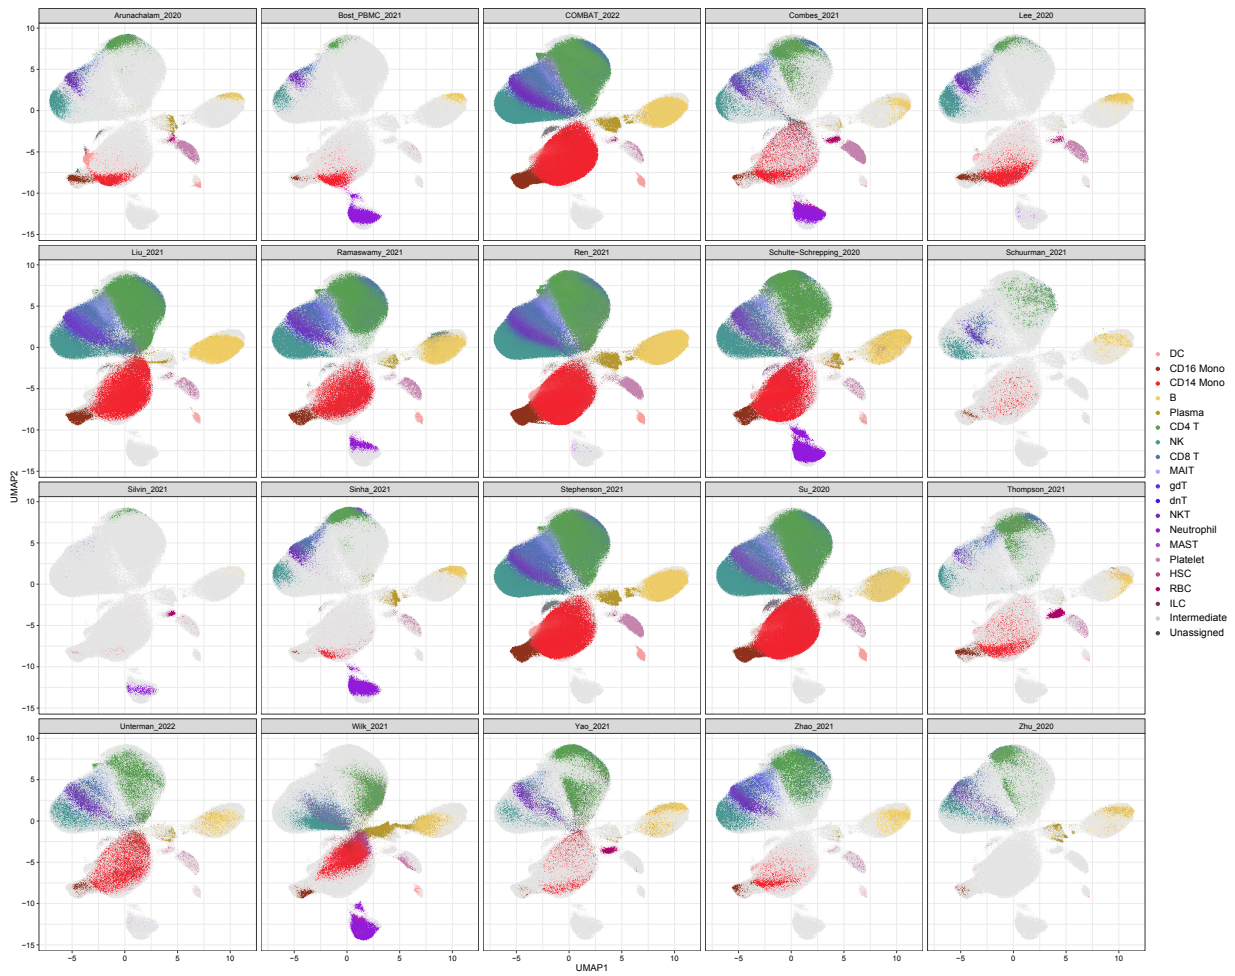

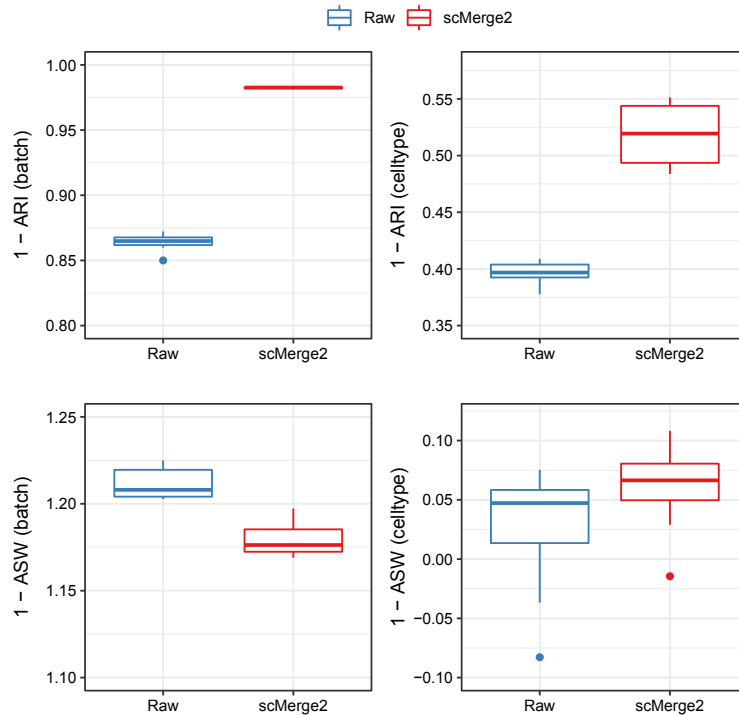

Supplementary Figure S13: Boxplots of evaluation metrics of COVID-19 scRNA-seq data collection for scMerge2-h (data merged in a hierarchical manner) and Raw, where the first row indicates the results of adjusted rand index (ARI): 1 minus batch ARI (left) and cell type ARI (right); the second row indicates the results of Average silhouette width (ASW): 1 minus batch ASW (left) and cell type ASW (right). For all of the four metrics, higher value indicates better performance. Since the size of this data collection is large, we subsampled 1% of the cells to calculate the metrics, and repeated this procedure 10 times. Each box ranges from the first to third quartile of evaluation metrics with the median as the horizontal line. The box plot's lower whisker extends 1.5 times the interquartile range below the first quartile, while the upper whisker extends 1.5 times the interquartile range above the third quartile.

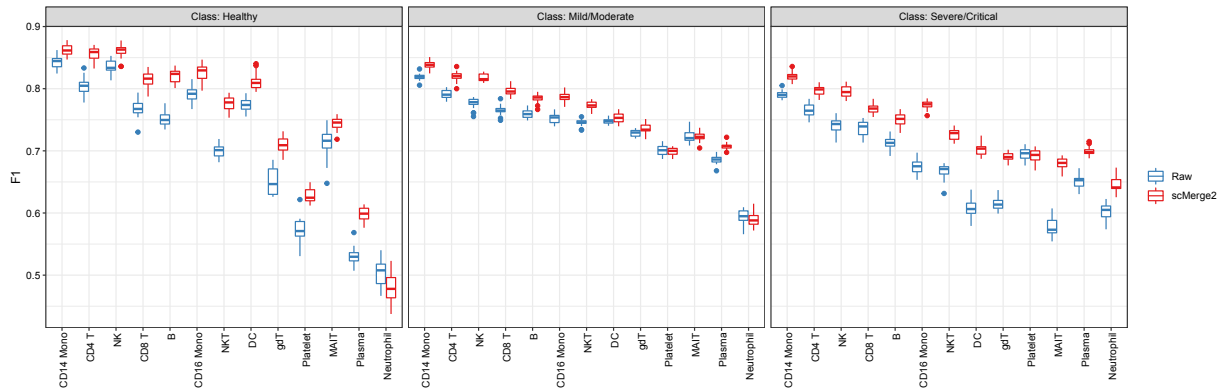

Supplementary Figure S14: Prediction results from 20 times repeated cross validation of disease severity using cell type-specific aggregated expression calculated from raw logcounts (blue) and scMerge2 adjusted results (red), evaluated by class-specific F1 scores. Each box includes 20 points, ranges from the first to third quartile of F1 scores with the median as the horizontal line. The box plot's lower whisker extends 1.5 times the interquartile range below the first quartile, while the upper whisker extends 1.5 times the interquartile range above the third quartile.

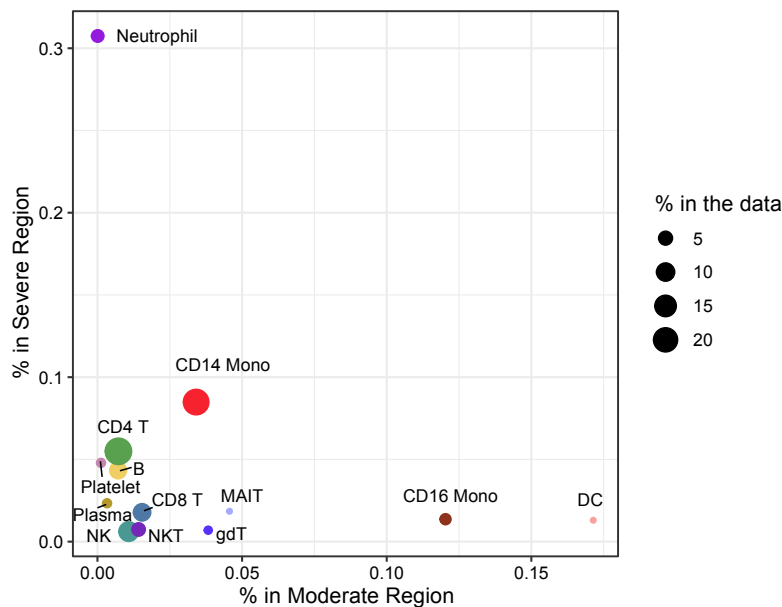

Supplementary Figure S15: Scatter plot shows the proportion of cells in Moderate region (x-axis) vs the proportion of cells in Severe region, determined by Daseq. The size of each point indicates the cell type proportion in the all data (Only cell types that have more than 1% in the data are shown).

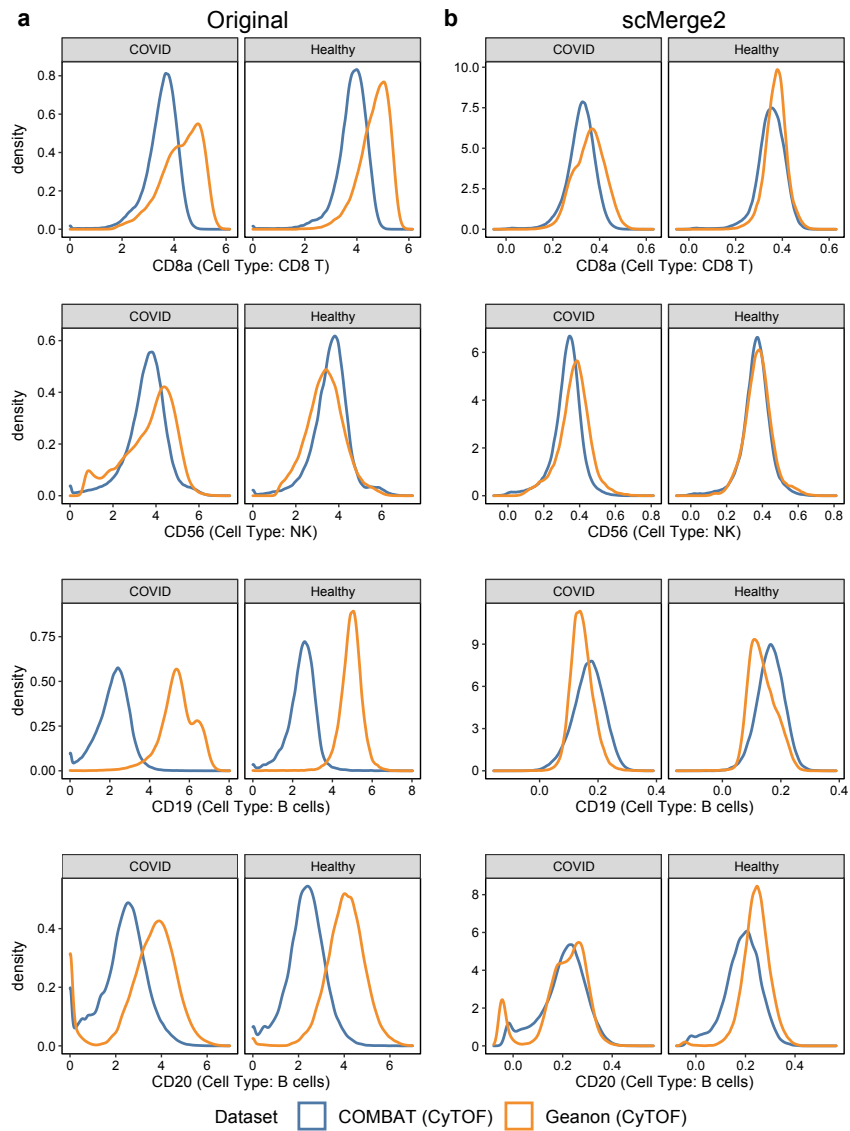

Supplementary Figure S16: Density plot of selected marker in specific cell type: CD8a in CD8 T cells; CD56 in NK cells; CD19 in B cells and CD20 in B cells, using (a) original expression and (b) scMerge2 adjusted expression. Within a specific cell type, the distribution of the cell type marker is expected to be similar between two datasets.

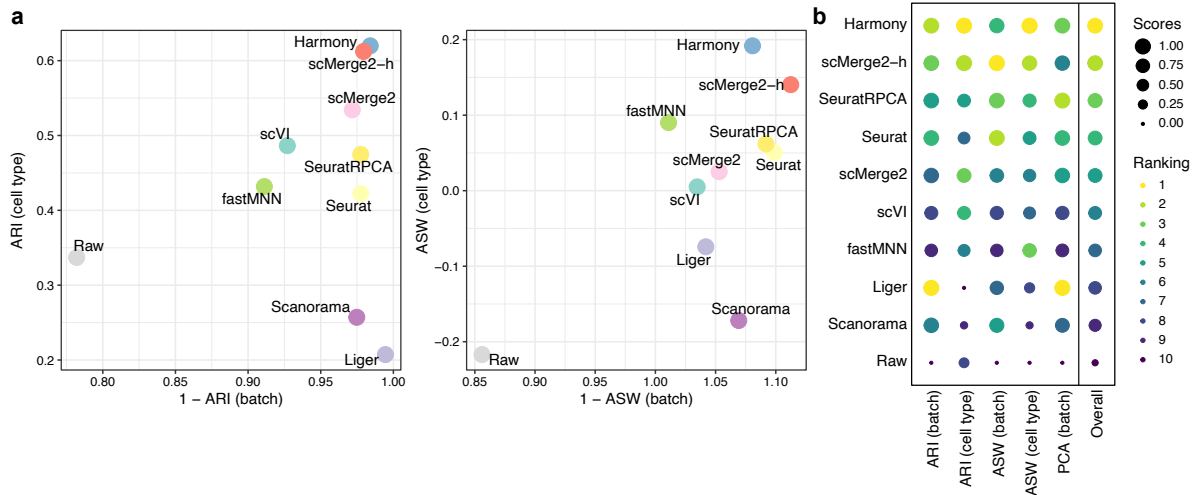

Supplementary Figure S17: CITE-seq data example: (a) Scatter plots of evaluation metrics of ADT data integration of a 200k cells subset of two COVID-19 studies (Liu and Stephenson) for scMerge2, scMerge2-h (data merged in a hierarchical manner), Seurat, Seurat (RPCA), Harmony, fastMNN, Liger, scVI, Scanorama and Raw: Adjusted rand index (ARI) (left panel), where x-axis indicates 1 minus batch ARI and y-axis indicates cell type ARI; Average silhouette width (ASW), where x-axis indicates 1 minus batch ASW and y-axis indicates cell type ASW (right panel). (b) Dot plots indicates the ranking of the data integration methods in terms of 5 different evaluation metrics. The size of the dot indicates the scaled scores, which are obtained from the min-max scaling of the original values. The overall ranking is ranked based on the average ranking of the five evaluation metrics.

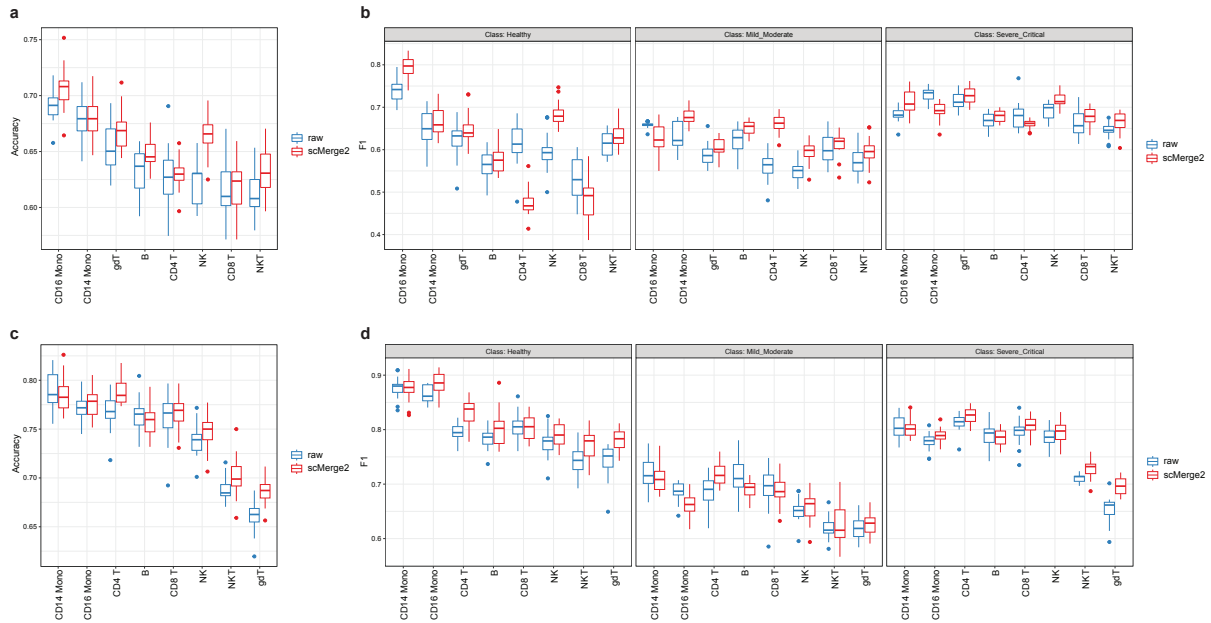

Supplementary Figure S18: CITE-seq data example: Prediction results from 20 times repeated cross validation of disease severity of disease severity using cell type-specific aggregated expression calculated from raw logcounts (blue) and scMerge2 normalised results (red), using (a-b) ADT expression and (c-d) RNA expression. Each box include 20 points, ranges from the first to third quartile of classification accuracy or F1 scores with the median as the horizontal line. The box plot's lower whisker extends 1.5 times the interquartile range below the first quartile, while the upper whisker extends 1.5 times the interquartile range above the third quartile.
